# Supplementary material for: Excitatory motor neurons are local oscillators for backward locomotion
Source: eLife journal article supplement (doi:10.7554/elife.29915), 2017-11-28
Supplement: figures [file elife-29915-figures-v1.pdf]

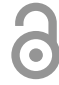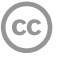

---

## Figures and figure supplements

Excitatory motor neurons are local oscillators for backward locomotion

**Shangbang Gao et al**

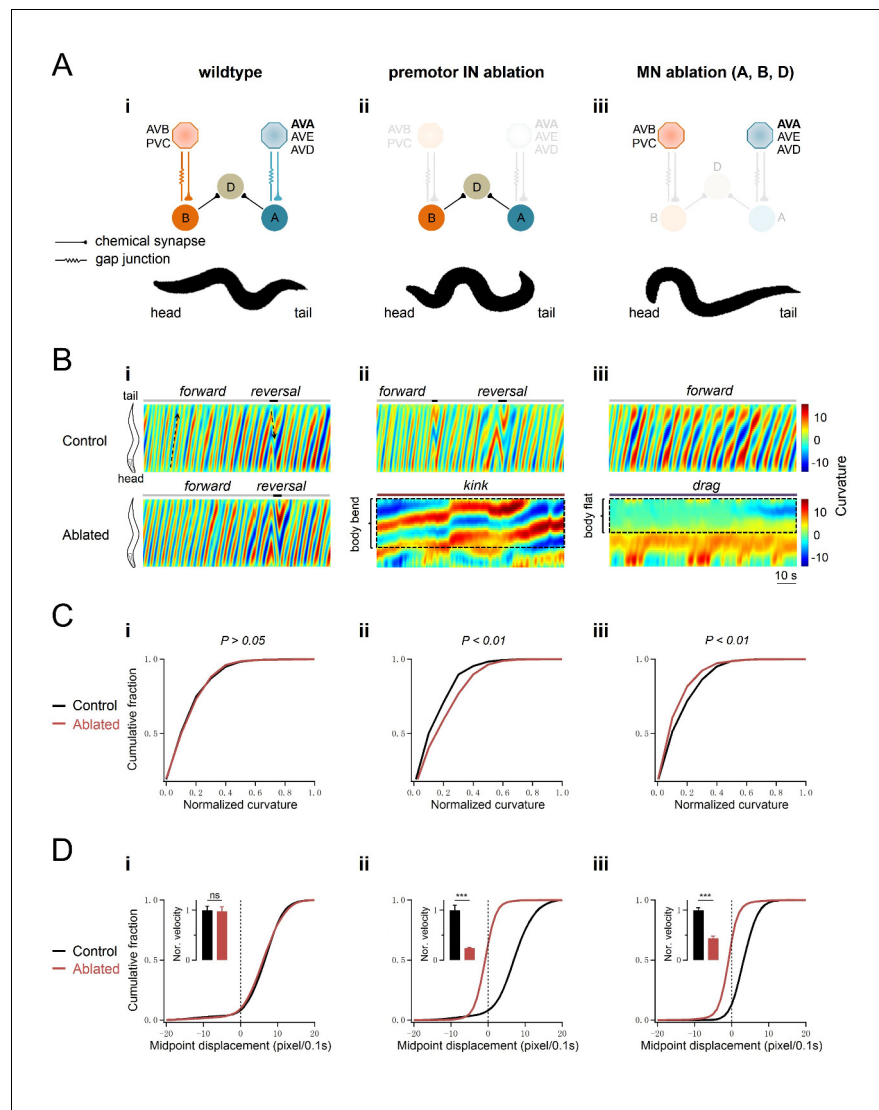

**Figure 1.** Body bends persist upon the ablation of premotor INs. **(A)** The removal of premotor INs or MNs exerts different effects on body bends. *Upper panel:* schematics of the *C. elegans* motor circuit components and connectivity in wildtype animals (i) and upon ablation of respective neuronal populations (ii, iii). Hexagons and circles represent premotor INs and ventral cord MNs, respectively. Orange and blue denote components of the forward and reversal motor circuit, respectively. Taupe denotes neurons that participate both forward and backward locomotion. *Lower panel:* a snap shot of representative body posture exhibited by adult *C. elegans* with intact motor circuit (i), and upon the ablation of premotor INs (ii) or MNs (iii). **(B)** Representative curvature kymograms along the body of moving animals in respective genetic backgrounds. The upper and lower panels denote animals without (Control) and with (Ablated) LED illumination-induced neuron ablation during development. Black arrows on kymograms denote the direction of body bend propagation. (i) Wildtype (N2) animals exhibit a preference for continuous forward locomotion, consisting of anterior to posterior body bend propagation, with occasional and short backward locomotion, exhibited as posterior to anterior body bend propagation; (ii) ablation of all premotor INs (Ablated) leads to stalled body bending that prevents the propagation of head bending; (iii) simultaneous ablation of three major MN classes largely eliminates body bending in regions posterior to head. **(C)** Distribution of body curvatures posterior to head (33–96% anterior-posterior of body length) in wildtype (i), premotor INs-ablated (ii), and MNs-ablated (iii) animals, with (Control) and without (Ablated) LED illumination-induced neuronal ablation. Premotor INs ablation leads to an increase (ii) whereas MN ablation a decrease (iii) of the bending curvature. **(D)** Distribution of instantaneous velocity, represented by centroid displacement, in wildtype (i) premotor INs-ablated (ii) and MNs-ablated (iii) animals, with (Control) and without (Ablated) neuronal ablation. The ablation of either premotor INs or MNs leads to a drastic

Figure 1 continued on next page

*Figure 1 continued*

reduction of velocity.  $n = 10$  animals per group (C, D).  $p > 0.05$  (not significant),  $***p < 0.001$  against the respective non-ablated Control group by the Kolmogorov-Smirnov test.

DOI: <https://doi.org/10.7554/eLife.29915.002>

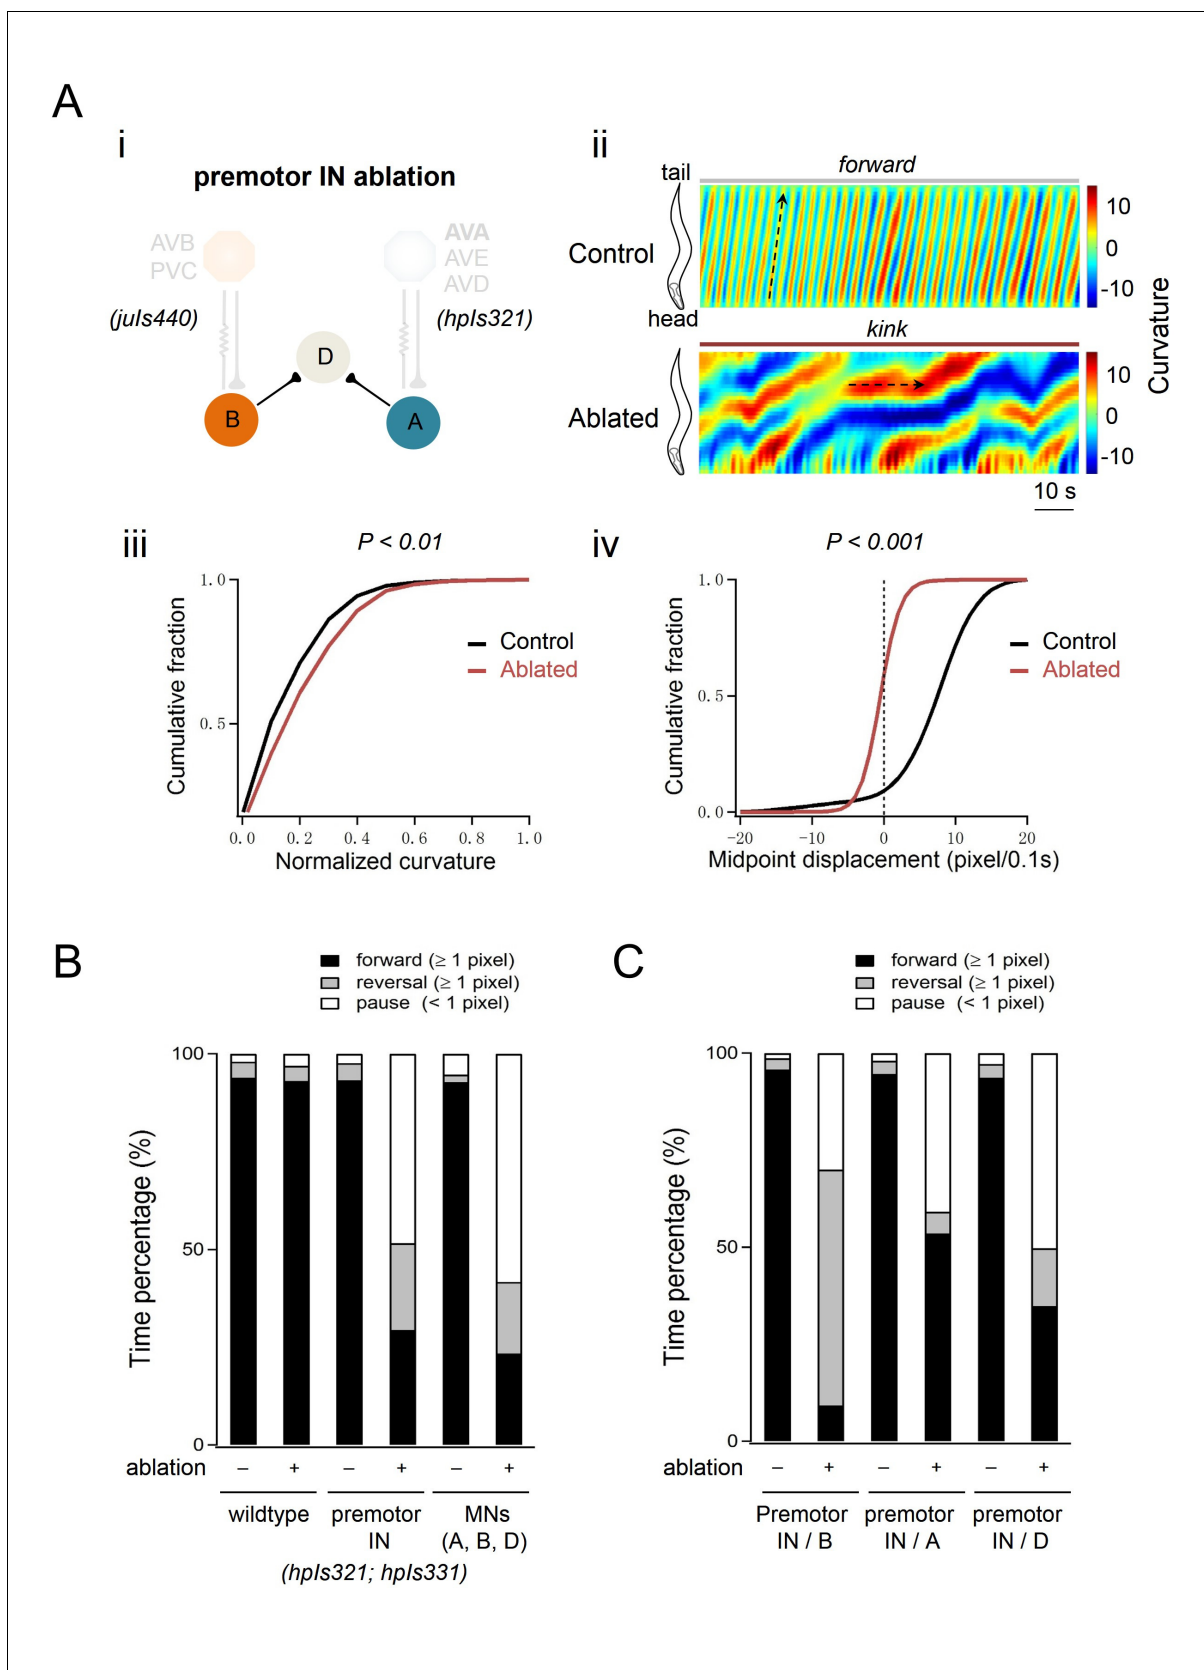

**Figure 1—figure supplement 1.** (A) Locomotor phenotypes of animals upon the ablation of premotor INs and (B,C) the propensity of directional movements in animals of respective genotypes. (A) Ablation of all premotor INs, using a different miniSOG transgene combination, also leads to the Figure 1—figure supplement 1 continued on next page

## Figure 1—figure supplement 1 continued

*kinker* motor defects. (i) Schematics of the motor circuit components and connectivity in animals upon ablation of respective neuronal populations. The AVA, AVE, AVD, and PVC INs were ablated using the same transgene as in **Figure 1** (*hpls321*). Different from **Figure 1**, AVB INs were ablated using another transgene (*juls440*) instead of *hpls331*. *hpls331* and *juls440* overlap in miniSOG expression only in AVB. (ii) Representative curvature kymograms of moving animals. The upper and lower panels denote animals without (Control) and with (Ablated) LED illumination-induced neuronal ablation. The horizontal black arrow on the kymogram denotes the lack of body bend propagation. Ablation of premotor INs leads to antagonizing head and tail body bends, or *kink*. (iii) Ablation of premotor INs leads to increased curvatures. (iv) Distribution of instantaneous velocity, represented by the animal's mid-point displacement, without (Control) and with (Ablated) ablation. Premotor INs ablation leads to a drastic reduction of velocity. (**B, C**) Propensity of directional movements in animals of respective genotypes, quantified by the animal's mid-point displacement. The ablation of premotor INs or A/B/D-MNs shifts the animal's preference for backward locomotion and drastic increase propensity for the pause state (**B**). The co-ablation of premotor INs and B-MNs shifts the animal's preference for backward locomotion, whereas the co-ablation of premotor INs and A-MNs shifts their preference for forward locomotion (**C**). The co-ablation of premotor INs and D-MNs does not alleviate the *kinker* posture (**C**). All exhibit a drastic increase propensity for the pause state.  $n = 10$  animals per group.  $p < 0.01$ ;  $p < 0.001$  against with the respective non-ablated Control group by the Kolmogorov-Smirnov test.

DOI: <https://doi.org/10.7554/eLife.29915.003>

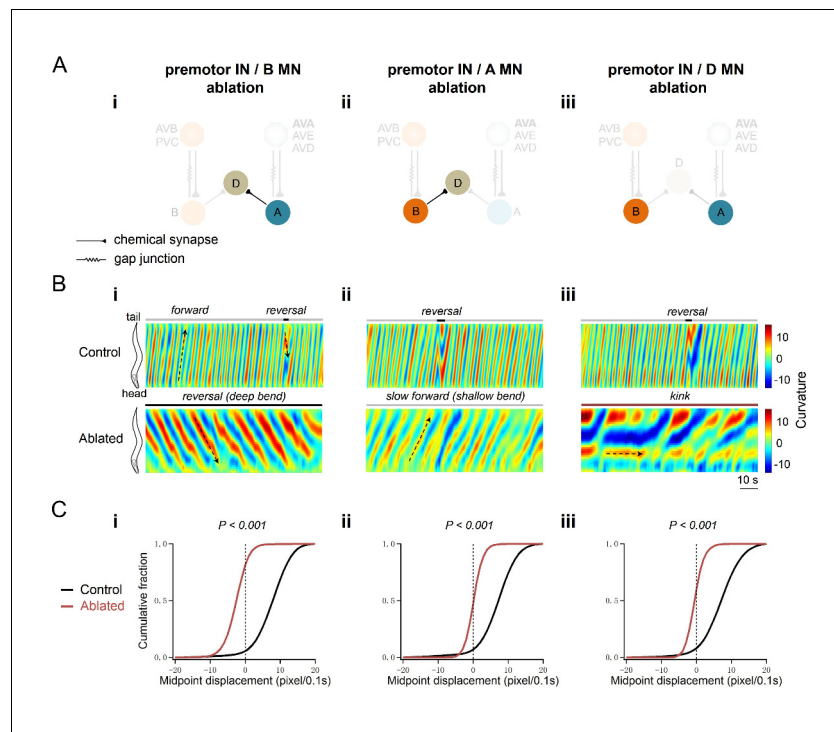

**Figure 2.** A-MNs execute directional, rhythmic locomotion without premotor INs. (A) Schematics of the motor circuit components and connectivity of animals of respective genotypes, upon co-ablation of premotor INs and B-MNs (i), premotor INs and A-MNs (ii), or premotor INs and D-MNs (iii). (B) Representative curvature kymograms along the entire length of moving animals, without (Control) and with (Ablated) LED illumination-induced neuronal ablation. Black arrows pointing upwards and downwards on kymograms denote posteriorly or anteriorly propagating body bending, respectively. The horizontal arrow denotes the absence of bending propagation. Animals without premotor INs and B-MNs (i, lower panel) exhibit backward locomotion, as posterior to anterior propagating deep body bends, regardless of the propagation direction of head bending. Those without premotor INs and A-MNs (ii, lower panel) often exhibit slow forward locomotion, consisted of slowly propagating, anterior to posterior, shallow body bends. Animals without premotor INs and D-MNs (iii, lower panel) lead to *kinker* postures as in premotor INs-ablated animals. (C) Distribution of instantaneous velocity of animals of respective genotypes, represented by the mid-point displacement. The forward velocity (ii) is drastically reduced, whereas reversal velocity (i) is less affected than upon ablation of premotor INs.  $n = 10$  in each group,  $p < 0.001$  against the respective non-ablated Control group by the Kolmogorov-Smirnov test.

DOI: <https://doi.org/10.7554/eLife.29915.005>

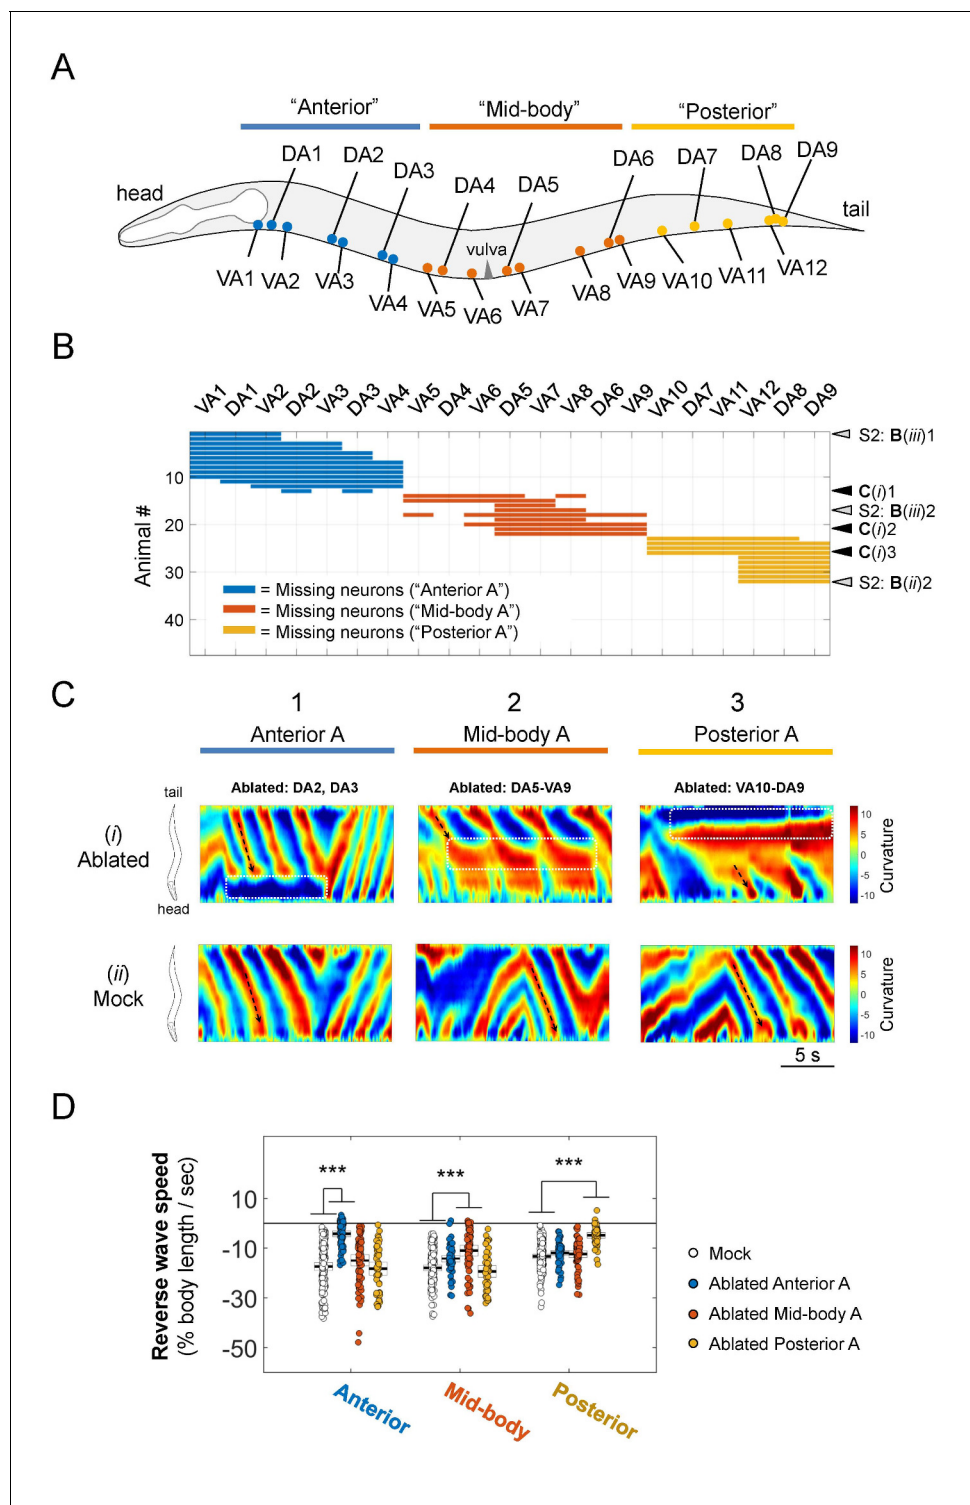

**Figure 3.** Sparse removal of A-MNs alters, does not abolish backward locomotion. (A) Schematic of the approximate locations of all A-MNs and regions of targeted ablation. An ablation is classified as ‘Anterior’, ‘Mid-body’, or ‘Posterior’ when at least one neuron from each region was ablated, and no neurons from other regions were ablated. (B) Missing A-MNs for each animal that was classified as Anterior ( $n = 13$ ), Mid-body ( $n = 9$ ), Posterior ( $n = 10$ ), or Mock ( $n = 17$ ) ablated. Black and gray arrowheads denote animals whose curvature kymograms are shown in (C) and **Figure 3—figure supplement 1**, respectively. (C) Representative curvature kymograms for each ablation type (upper panels) and mock controls for three strains from which pooled ablation data were quantified (lower panels). (D) The rate of reversal bending wave propagation in the anterior, mid- and posterior body for each ablation class. Each dot represents one bout of reversal movement  $> 3$  s. Black bars indicate the mean, and white boxes denote the 95%  
Figure 3 continued on next page

*Figure 3 continued*

confidence interval of the mean. Ablation decreases bending frequency locally, but not in other body regions. \*\*\* $p < 0.001$  by one-way ANOVA followed by Bonferroni post-hoc comparisons.

DOI: <https://doi.org/10.7554/eLife.29915.007>

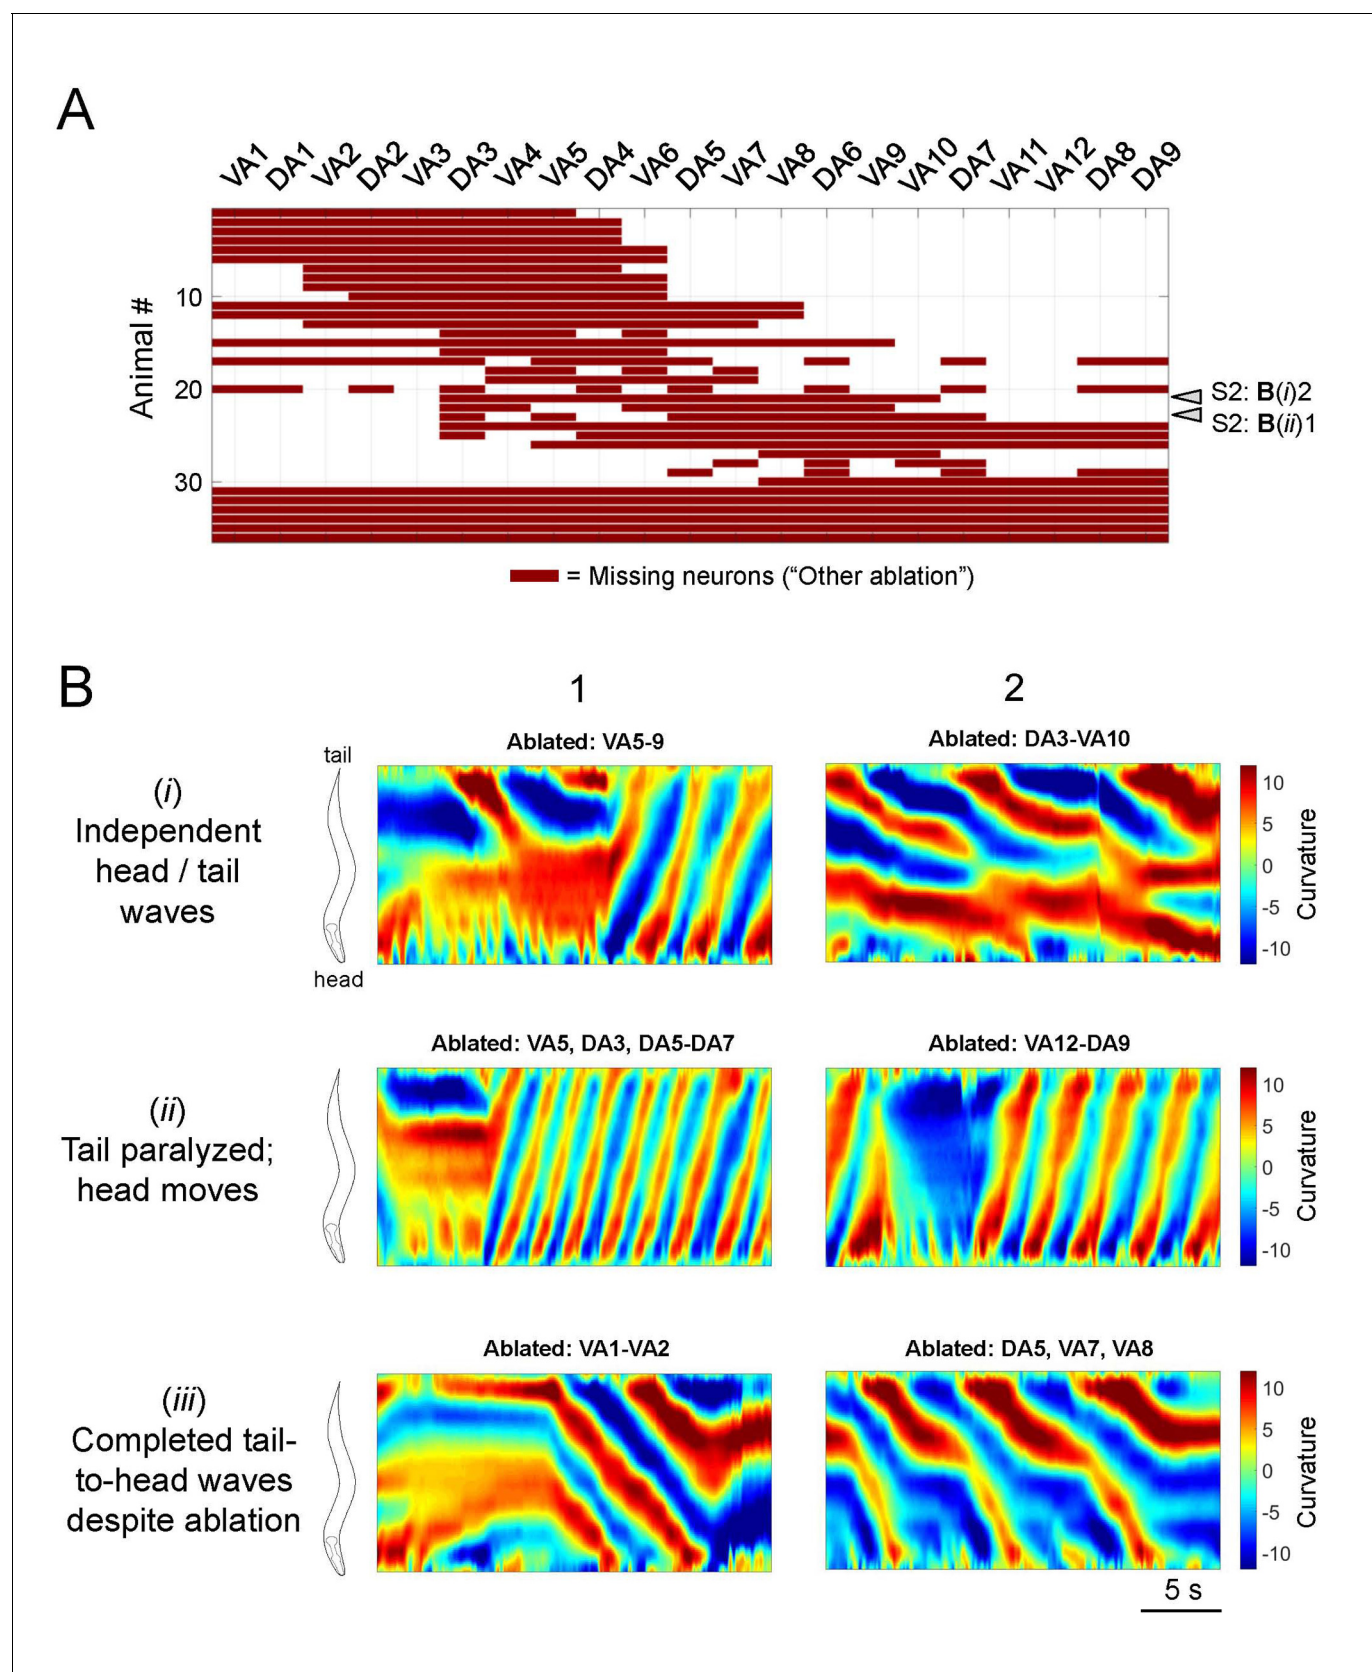

**Figure 3—figure supplement 1.** Information on all other partial A-MN-ablated animals. (A) The ablation pattern of all animals that were examined in our study but could not be classified into the ablation groups as defined in **Figure 3**. Arrowheads denote animals whose curvature kymograms were **Figure 3—figure supplement 1 continued on next page**

*Figure 3—figure supplement 1 continued*

shown in Panel B. (B) Additional example curvature kymograms from classified (**Figure 3**) and not classified (this figure) ablated animals with different phenotypes: those with independent head and tail oscillations (i) head oscillations with little tail oscillations (ii) and complete tail-to-head bending waves despite a few missing motor neurons (iii). Black arrows on kymograms denote the direction of body bending propagation.

DOI: <https://doi.org/10.7554/eLife.29915.008>

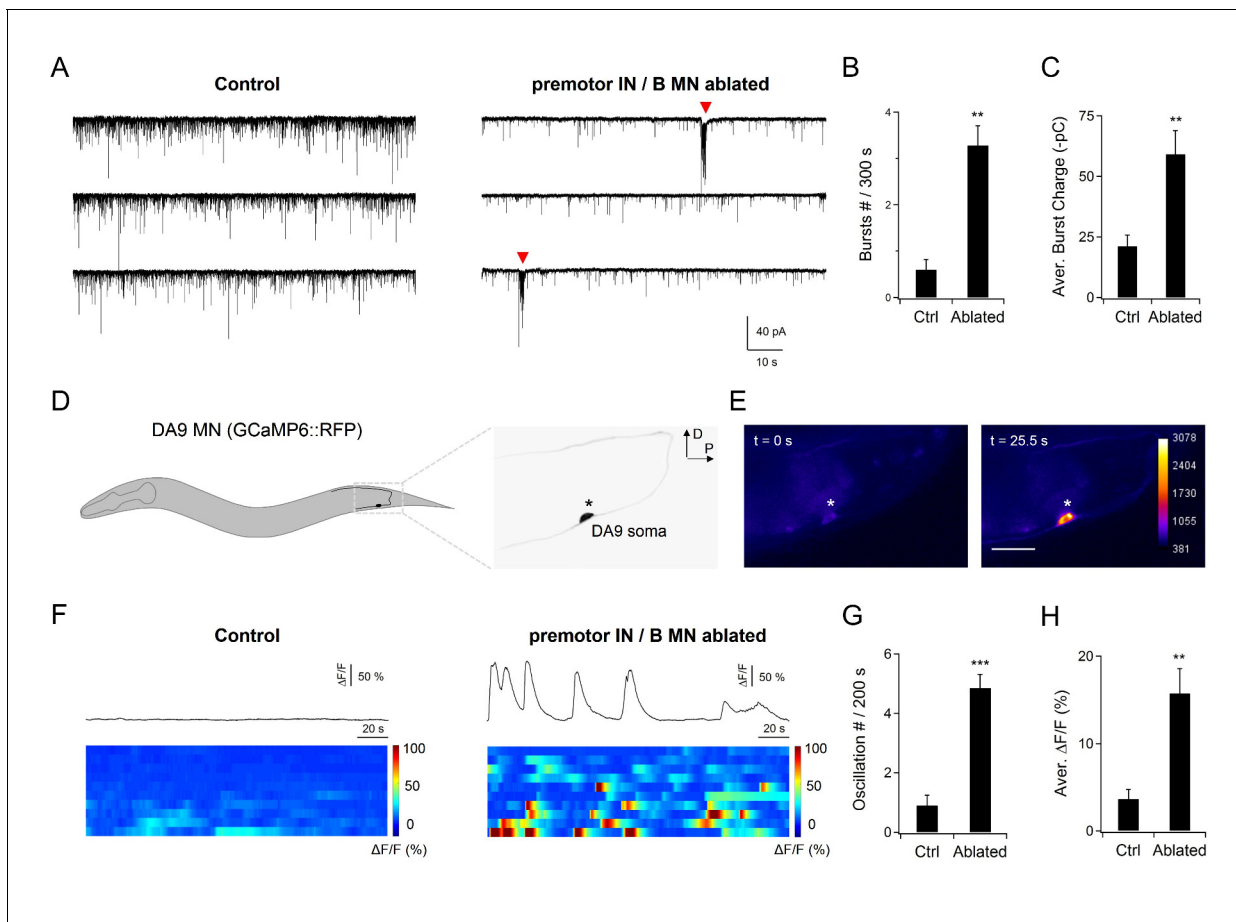

**Figure 4.** A-MNs exhibit rhythmic activities upon the ablation of premotor INs. (A) A representative post-synaptic PSC recording at the NMJ preparation of the same genotype, without (Control, left panel) or with (Ablated, right panel) LED illumination-induced ablation of premotor INs and B-MNs. Rhythmic PSC burst events (arrowheads) were consistently observed upon the removal of premotor INs and B-MNs. (B, C) Quantification of the rPSC burst frequency (B) and discharge (C), without (Ctrl) or with (Ablated) ablation. Both the rPSC bursts frequency and discharge are significantly increased in Ablated animals.  $n = 10$  animals each group. (D) Schematics of the morphology and trajectory of the DA9 MN soma and processes, visualized by an A-MN GCaMP6s::RFP  $\text{Ca}^{2+}$  reporter. (E) Fluorescent signals during oscillatory  $\text{Ca}^{2+}$  changes in the DA9 soma. (F) Examples of the DA9 soma  $\text{Ca}^{2+}$  transient traces, and raster plots of recordings from individual animals of the same genotype, without (Control) and with (Ablated) the ablation of premotor INs and B-MNs.  $n = 10$  animals each group. (G, H) Quantification of the  $\text{Ca}^{2+}$  oscillation frequency and mean total  $\text{Ca}^{2+}$  activities, without (Ctrl) and with (Ablated) the ablation of premotor INs and B-MNs. Both the oscillation frequency and total activity of DA9 are significantly increased in ablated animals. \*\* $p < 0.01$ , \*\*\* $p < 0.001$  against the respective non-ablated Control group by the Mann-Whitney U test. Error bars, SEM.

DOI: <https://doi.org/10.7554/eLife.29915.010>

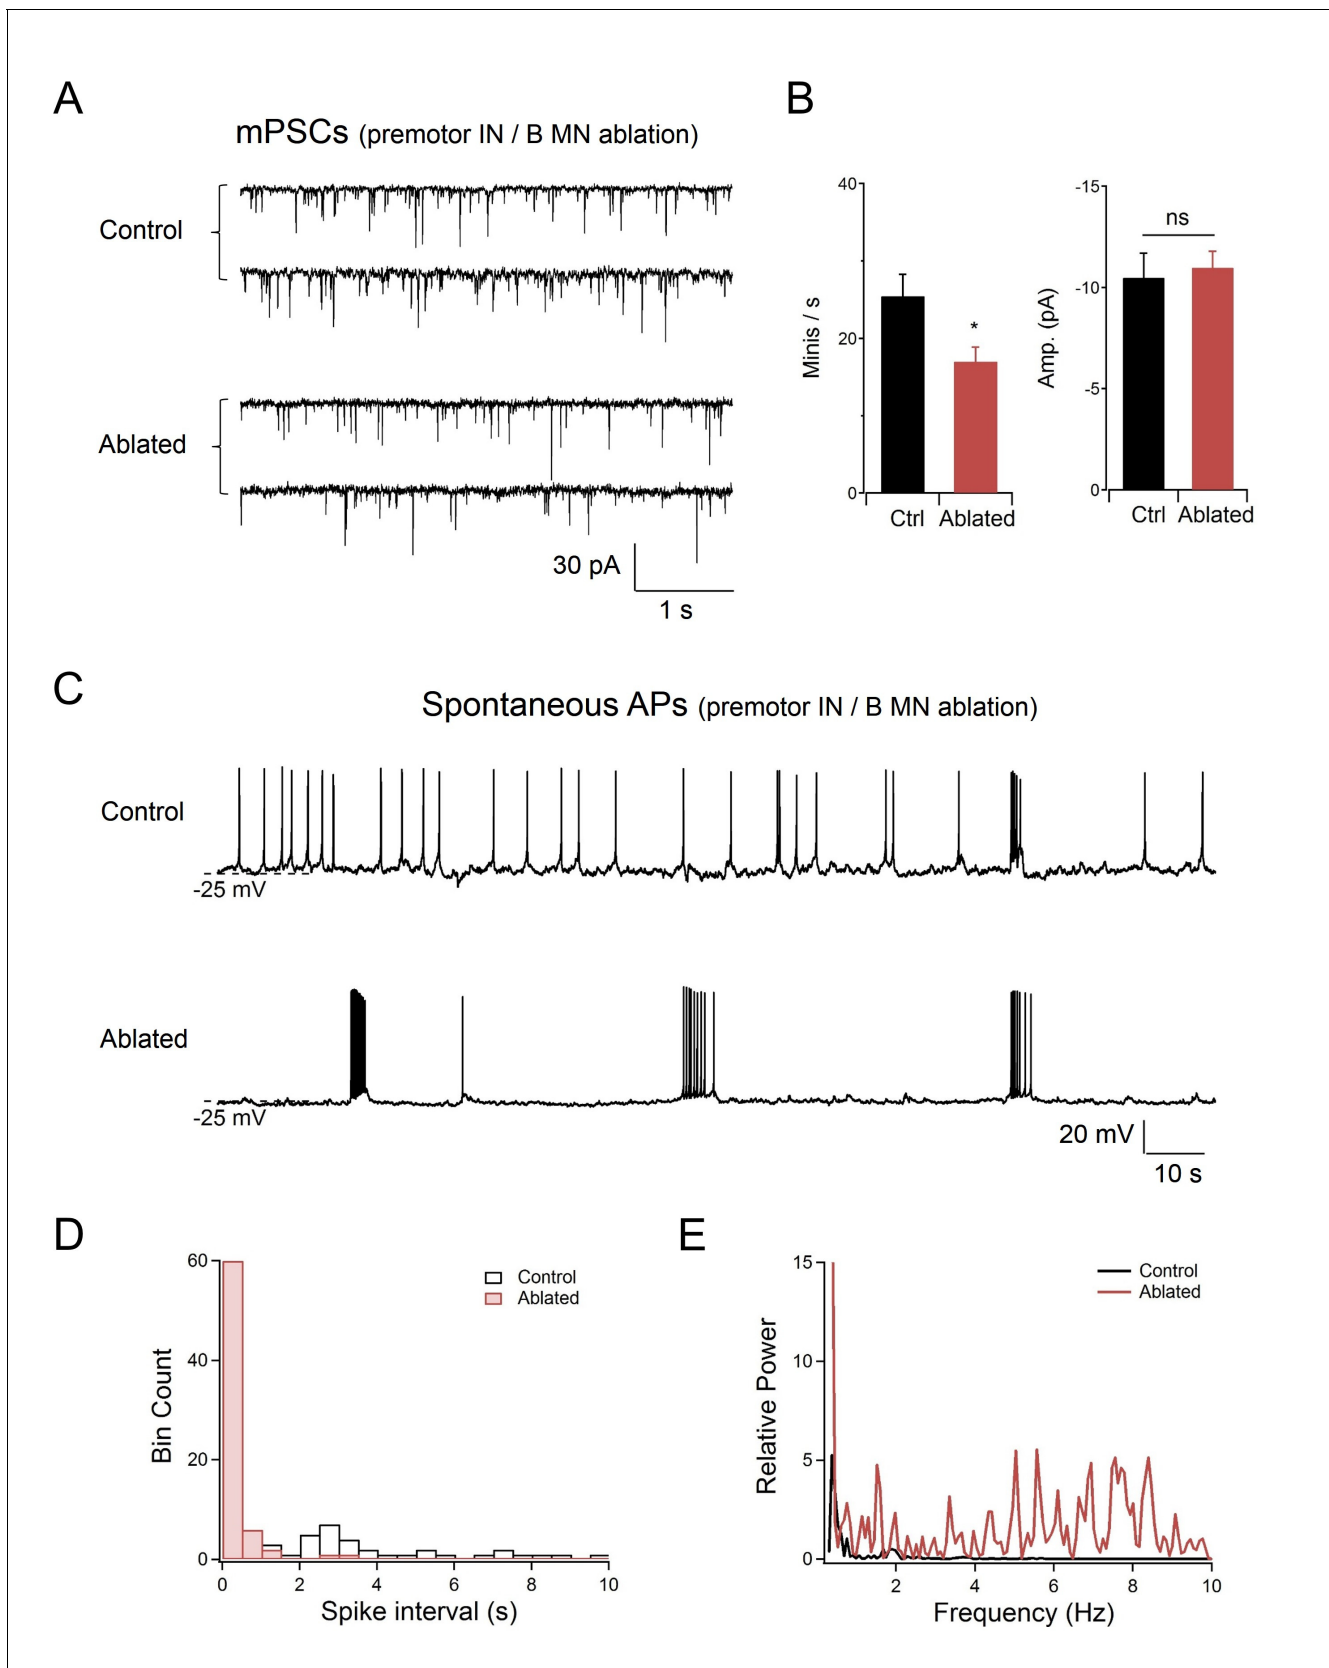

**Figure 4—figure supplement 1.** Rhythmic postsynaptic action potential bursts were observed upon the co-ablation of premotor INs and B-MNs at the neuromuscular preparation. (A) Representative spontaneous mini-postsynaptic currents (mPSCs) recorded at  $-60$  mV without (Control) and with

Figure 4—figure supplement 1 continued on next page

*Figure 4—figure supplement 1 continued*

(Ablated) the ablation of premotor INs and B-MNs. **(B)** Quantification of the mPSC frequency and amplitude, without (Ctrl) and with (Ablated) the ablation of premotor INs and B-MNs. Ablation of premotor INs and B-MNs only led to a moderate decrease of mPSC frequency, without changes in the amplitude.  $n = 10$  animals each group, ns, not significant,  $*p < 0.05$  against Control by the Mann-Whitney U test. Error bars, SEM. **(C)** Representative spontaneous action potentials (APs) by body wall muscles held at 0 pA, without (Control) and with (Ablated) the co-ablation of premotor INs and B-MNs. Resting membrane potential was unchanged, but the AP pattern was altered upon ablation. Control preparations exhibited single APs. After the ablation, periodic AP bursts were observed. **(D, E)** Quantification of the AP spike interval **(D)** and power spectrum of high frequency AP events **(E)** exhibited decrease and increase, respectively, upon the ablation of premotor INs and B-MNs.

DOI: <https://doi.org/10.7554/eLife.29915.011>

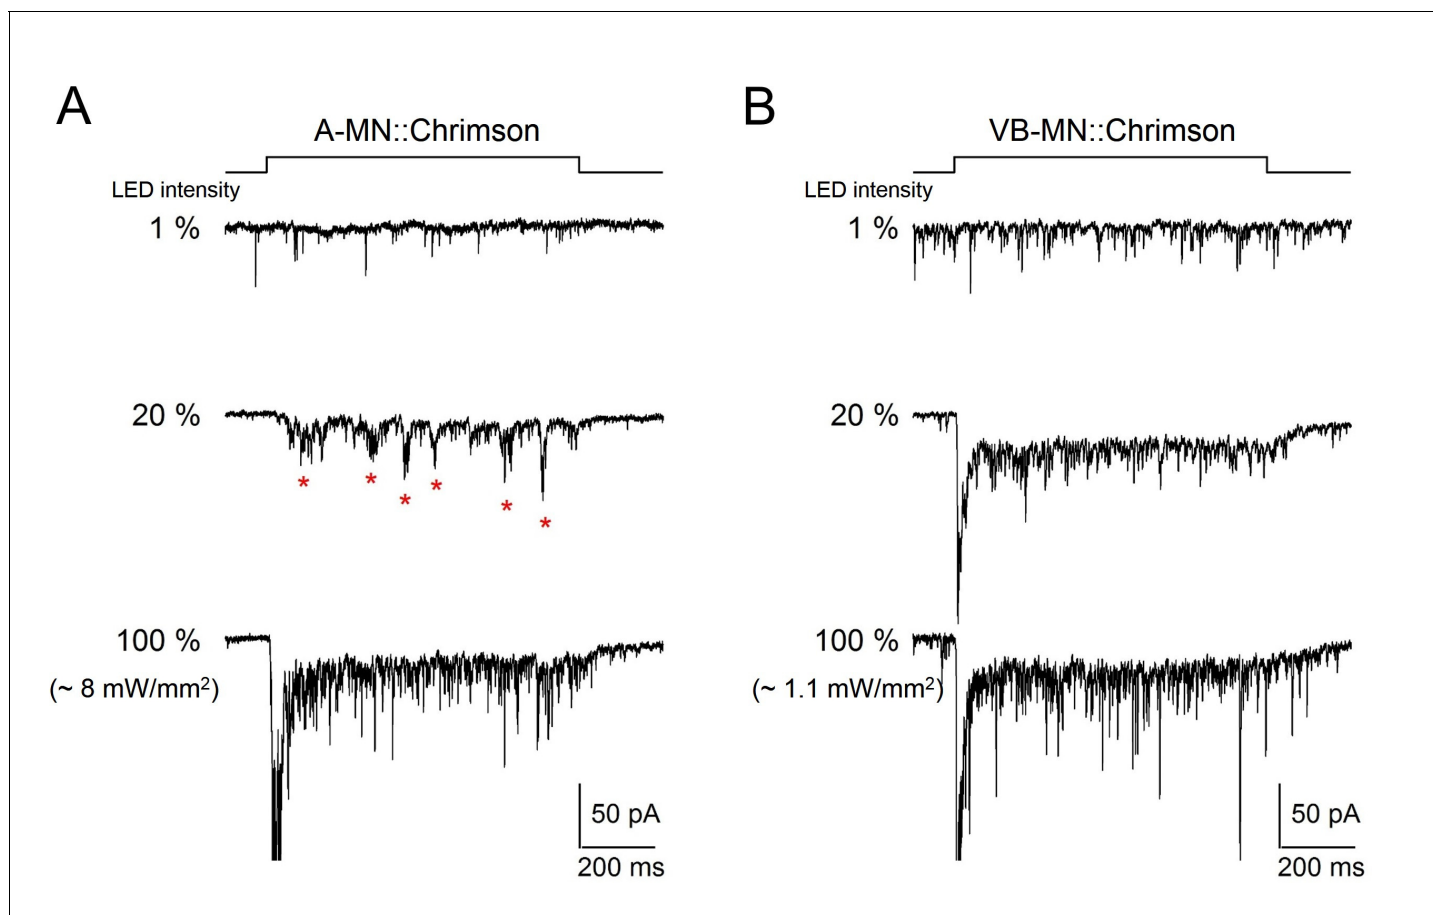

**Figure 4—figure supplement 2.** Direct optogenetic stimulation of A-MNs leads to rhythmic PSCs. (A, B) Representative traces of evoked postsynaptic currents upon LED-mediated optogenetic stimulation (Chrimson) of A-MNs (A), and ventral muscle innervating VB-MNs (B). Muscles were held at  $-60$  mV. Chrimson was expressed by *Punc-4* (A-MNs) and *Pceh-12* (VB-MNs), respectively. The top panel illustrates the duration of light stimulation. The PSC frequencies, upon sequential increase of light intensity, exhibited corresponding increase in both preparations. rPSCs, denoted as red stars were readily evoked upon the stimulation of A-MNs at intermediate stimulation intensity but were not observed within the examined range of VB-MNs stimulations.

DOI: <https://doi.org/10.7554/eLife.29915.012>

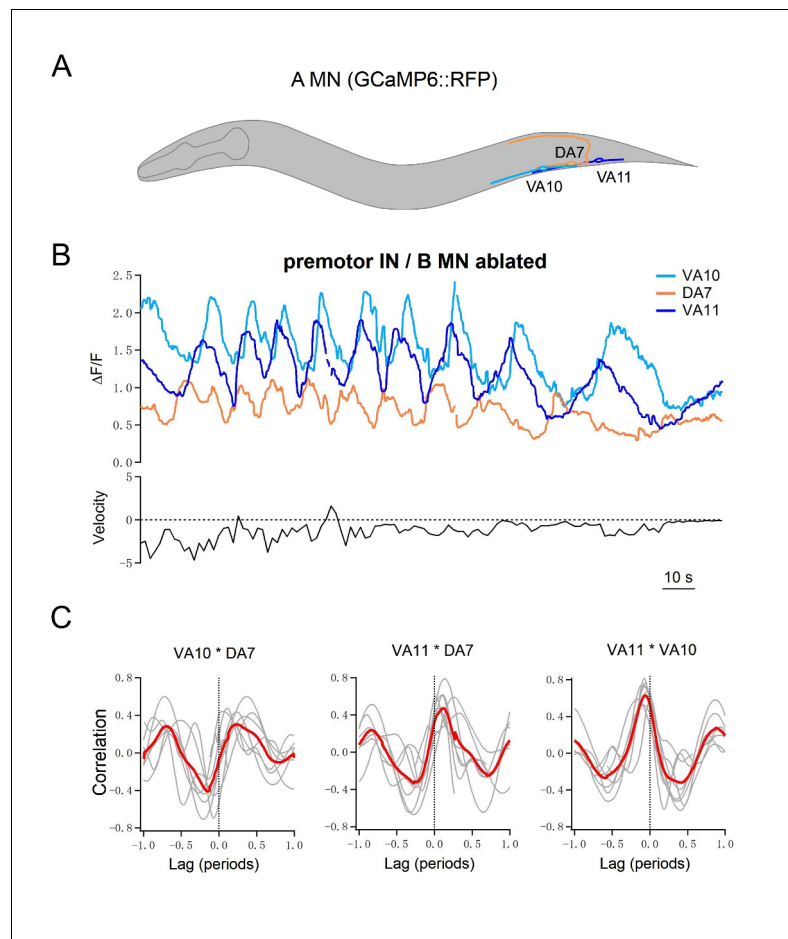

**Figure 5.** Multiple A-MNs are phase coupled to generate backward locomotion in the absence of premotor INs and B-MNs. (A) Schematics of the morphology and trajectory of the VA10, DA7, VA11 MN somata and processes. (B) *Upper panel:* example traces of calcium activities of three A-MNs, in animals where all premotor INs and B-MNs have been ablated. The VA10 and VA11 innervate adjacent ventral body wall muscles; the DA7 innervates dorsal muscles in opposition to those by the VA10 and VA11. Periodic  $\text{Ca}^{2+}$  oscillations were observed in all neurons, represented by changes in the GCaMP6/RFP ratio (Y-axis) over time (X-axis). *Lower panel:* the animal's instantaneous velocity (Y-axis) simultaneously recorded during calcium imaging, was represented by the displacement of the VA11 soma. Values above and below 0 indicate forward (displacement toward the head) and backward (displacement toward the tail) locomotion, respectively. This animal exhibited continuous reversals. Note that the speed of  $\text{Ca}^{2+}$  change during oscillation correlates with reversal velocity. (C) Phasic relationships among DA7, VA10, and VA11. DA7's activity change is anti-phasic to that of VA10 and V11, whereas the activity changes of VA10 and VA11 exhibit a small phase shift, with VA11 preceding VA10. The red line denotes the mean of all recordings.  $n = 7$  animals.

DOI: <https://doi.org/10.7554/eLife.29915.014>

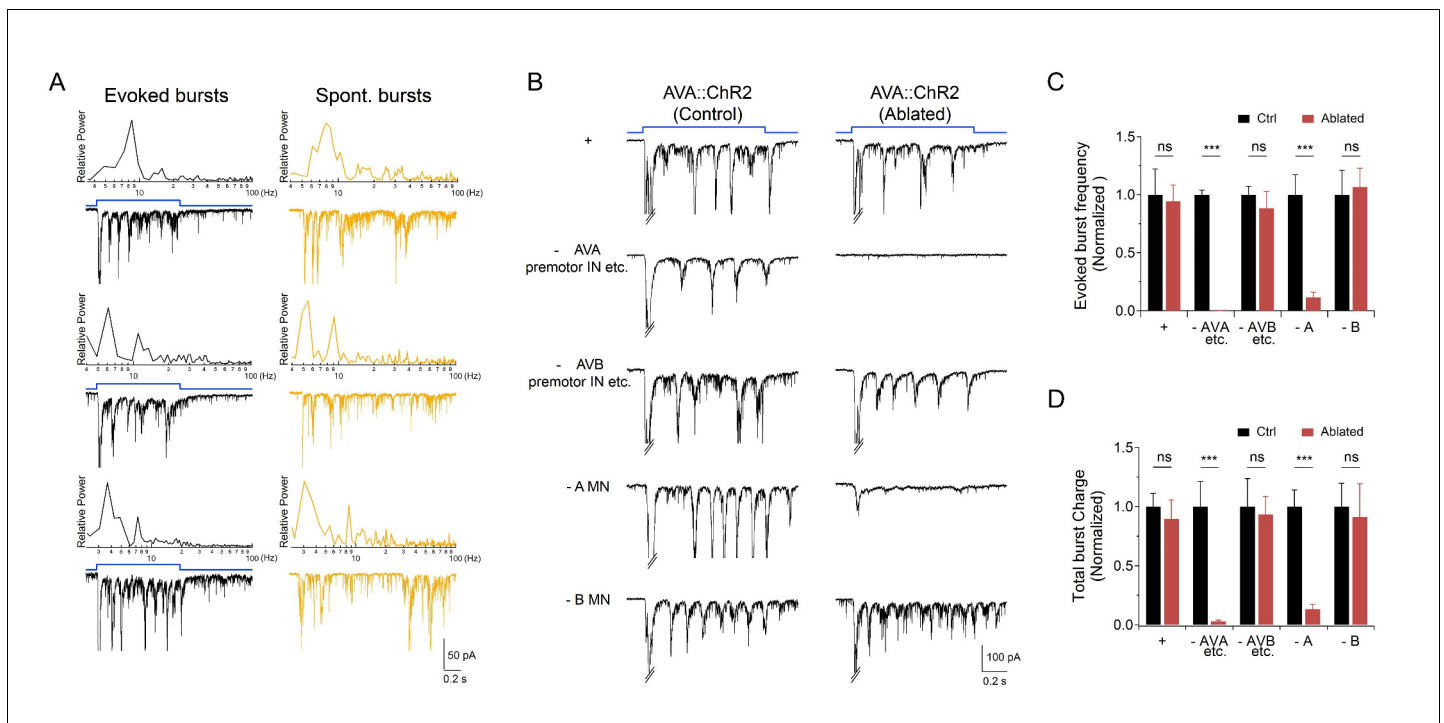

**Figure 6.** Activation of premotor INs AVA potentiates A-MN-dependent rPSC bursts. **(A)** The evoked and spontaneous rPSC bursts share frequency spectrum characteristics. *Black traces*: frequency spectrum analyses (upper panel) for three rPSC traces upon the optogenetic activation of AVA premotor INs (lower panel); *Yellow traces*: frequency spectrum analyses (upper panel) for three spontaneous rPSC bursts exhibited by animals upon the co-ablation of premotor INs and B-MNs (lower panel). **(B)** Representative traces of AVA-evoked rPSC bursts in respective genotypic backgrounds, both in the presence (Control) or absence (Ablated) of specific neuronal groups. +: *hpls270* (AVA-specific ChR2 activation upon exposure to LED, in wildtype background); - AVA: *hpls270; hpls321* (upon exposure to LED, after a subset of premotor INs including AVA were ablated); - AVB: *hp270; hpls331* (upon exposure to LED, after several INs including AVB were ablated); - A: *hpls270; hpls371* (upon exposure to LED, after A-MNs were ablated); - B: *hpls270; hpls604* (upon exposure to LED, after B-MNs were ablated). **(C)** Quantification of rPSC burst frequencies evoked by AVA activation in respective genetic backgrounds. **(D)** Quantification of total discharge of rPSC bursts evoked by AVA in respective genetic backgrounds. Both are diminished upon the ablation of AVA, but are not affected by ablation of the AVB premotor INs. They are both significantly decreased in A-, but not B-MN-ablated animals ( $n \geq 5$  in each data set). ns, not significant ( $p > 0.05$ ), \*\*\* $p < 0.001$  against the respective non-ablated Control group by the students'  $t$ -test. Error bars, SEM.

DOI: <https://doi.org/10.7554/eLife.29915.015>

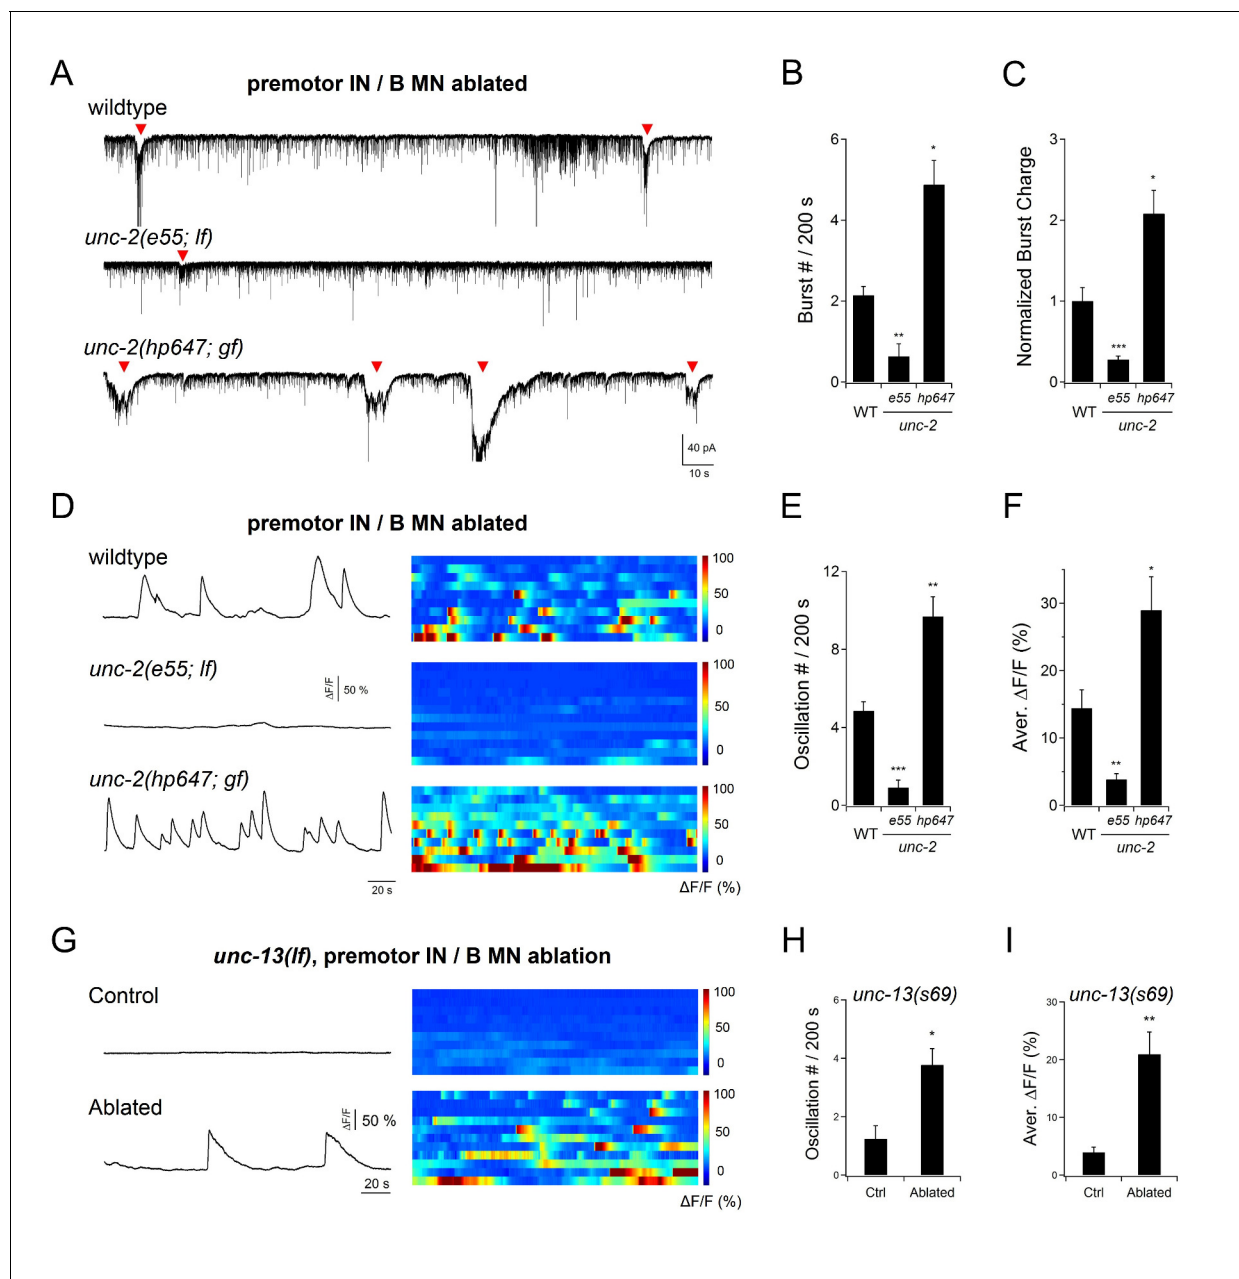

**Figure 7.** An endogenous UNC-2 channel activity regulates A-MN's rhythmic activity. (A) Representative PSC recordings of the NMJ preparations of respective genotypes, after the co-ablation of premotor INs and B-MNs. The amplitude and frequency of periodic rPSC bursts (arrowheads) were reduced in *unc-2(e55; lf)*, and increased in *unc-2(hp647; gf)* mutant animals. (B) Quantification of the rPSC burst frequency in respective genotypes. (C) Quantification of the total discharge of rPSC bursts in respective genotypes. Both were reduced in *unc-2(e55; lf)*, and increased in *unc-2(hp647; gf)* mutants ( $n \geq 7$  in each dataset). (D) Example traces of the DA9 soma  $Ca^{2+}$  recording (left panels), and raster plots of all  $Ca^{2+}$  recordings (right panels) in wildtype animals ( $n = 10$ ), *unc-2(e55; lf)* ( $n = 12$ ), and *unc-2(hp647; gf)* ( $n = 10$ ) mutants upon the co-ablation of premotor INs and B-MNs. (E) Quantification of DA9's  $Ca^{2+}$  oscillation frequency in respective genotypes upon the co-ablation of premotor INs and B-MNs. (F) Quantification of the overall DA9  $Ca^{2+}$  activity in respective genotypes upon premotor INs and B-MNs. When compared to wildtype animals, both the frequency and activity of  $Ca^{2+}$  oscillation are significantly reduced in *unc-2(e55; lf)* and increased in *unc-2(hp647; gf)* mutant animals. (G) Example DA9 soma  $Ca^{2+}$  traces (left panels) and raster plots of all  $Ca^{2+}$  traces (right panels) in *unc-13(lf)* mutants, without (Control,  $n = 10$ ) and with (Ablated) the co-ablation of premotor INs and B-MNs (Ablated,  $n = 11$ ). (H, I) Quantification of the  $Ca^{2+}$  oscillation frequency (H) and overall activities (I) in *unc-13* mutants. \* $p < 0.05$ , \*\* $p < 0.01$ , \*\*\* $p < 0.001$  against the respective non-ablated Control group by the Mann-Whitney U test.

DOI: <https://doi.org/10.7554/eLife.29915.016>

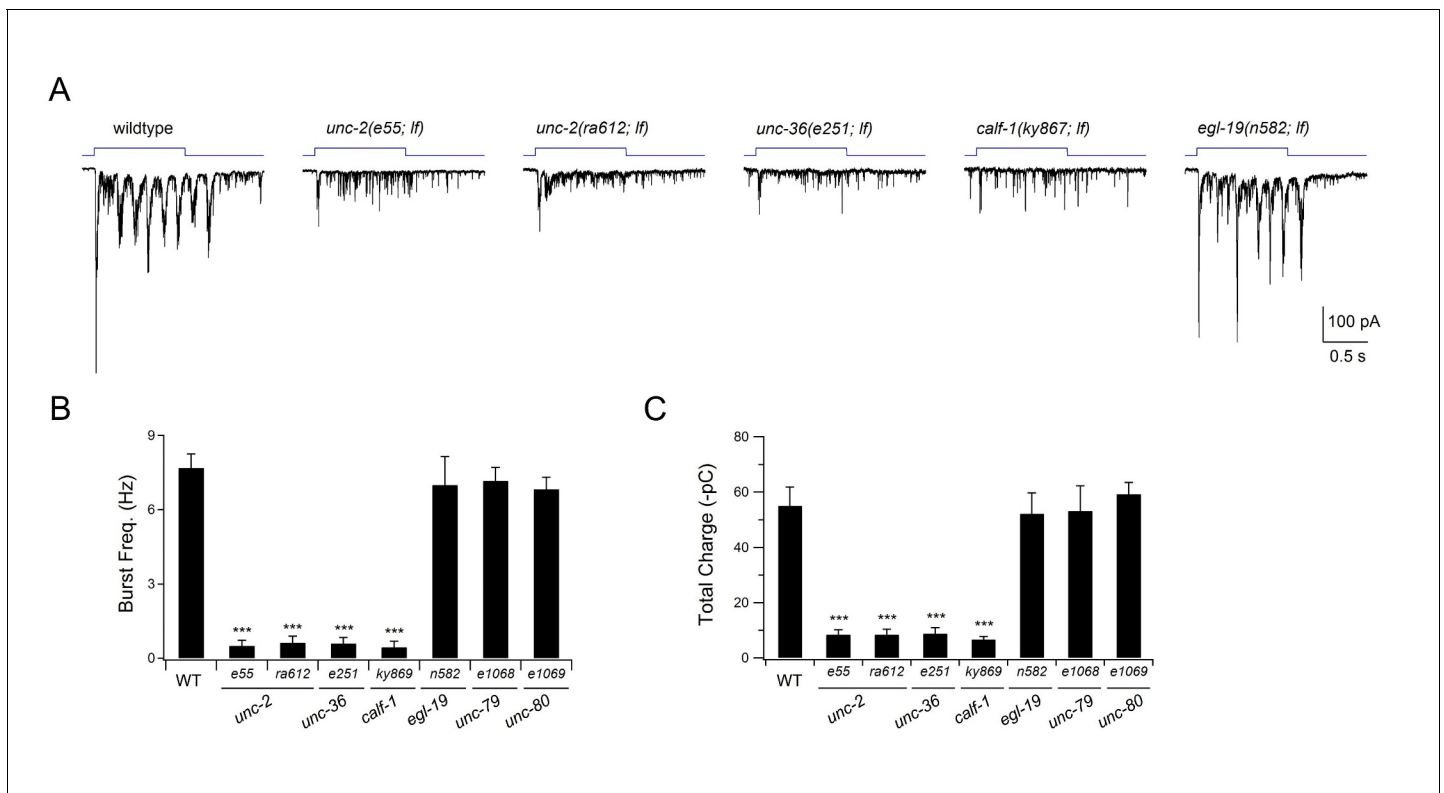

**Figure 7—figure supplement 1.** The P/Q/N-type VGCC UNC-2 is required for evoked rPSC bursts. **(A)** Representative traces for evoked rPSCs in animals of respectively genotypes. All are loss-of-function (*lf*) alleles. Wildtype refers to the optogenetic stimulation strain, *hpls166* (*Pglr-1::ChR2*), which expresses ChR2 in multiple premotor INs including AVA. The top panel illustrates the duration of continuous light stimulation. Partial *lf* alleles for the pore-forming alpha subunit UNC-2 (*e55* and *ra612*), beta subunit UNC-36 (*e251*), and the ER delivery subunit CALF-1 (*ky867*) of the P/Q/N-type VGCC exhibited the same phenotype: optogenetic stimulation of premotor INs led to increased mPSC frequency, but without rPSC bursts. The same stimulation protocol induced robust rPSC bursts in a partial *lf* mutant for the alpha subunit of the L-type VGCC EGL-19 (*n582*). **(B, C)** Quantification of the burst frequency (**B**) and total charge (**C**) of the evoked rPSC bursts. Both were reduced in the P/Q/N-VGCC mutants (*unc-2*, *unc-36*, and *calf-1*), but were unaffected in the L-VGCC (*egl-19*) and NCA sodium leak channel (*unc-79* and *unc-80*) mutants.  $n \geq 5$ . \*\*\* $p < 0.001$  against wildtype animals by the Mann-Whitney U test. Error bars, SEM.

DOI: <https://doi.org/10.7554/eLife.29915.017>

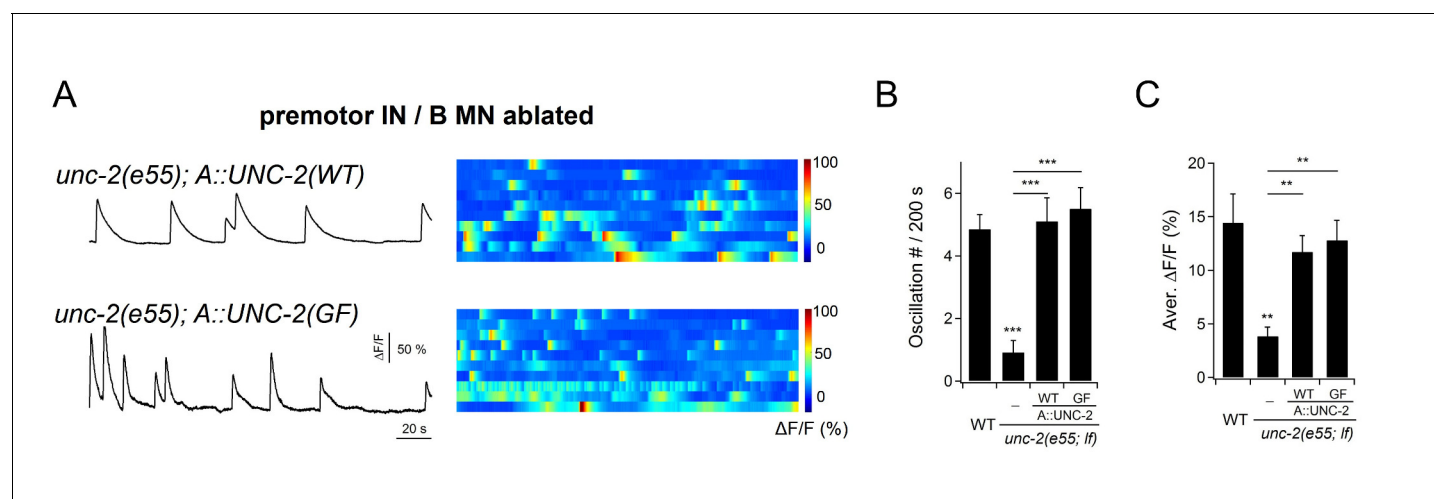

**Figure 7—figure supplement 2.** Cell-autonomous UNC-2 conductance underlies DA9 calcium oscillation. **(A)** Representative DA9  $\text{Ca}^{2+}$  transient traces (left panels), and raster plots of all  $\text{Ca}^{2+}$  recordings (right panels), when UNC-2(WT) or UNC-2(GF) were specifically restored into the A-MNs in *unc-2(e55); lf* mutant animals. All data were recorded after the co-ablation of premotor INs and B-MNs.  $n = 10$  per group. **(B)** Quantification of the DA9  $\text{Ca}^{2+}$  oscillation frequency in respective genotypes. **(C)** Quantification of overall DA9  $\text{Ca}^{2+}$  activity in respective genotypes. Both the frequency and level of DA9  $\text{Ca}^{2+}$  oscillation are rescued by specific restoration of either UNC-2(WT) or UNC-2(GF) to A-MNs. \*\* $p < 0.01$ , \*\*\* $p < 0.001$  against the premotor IN and B-MN-ablated wildtype animals by the Mann-Whitney U test. Error bars, SEM.

DOI: <https://doi.org/10.7554/eLife.29915.018>

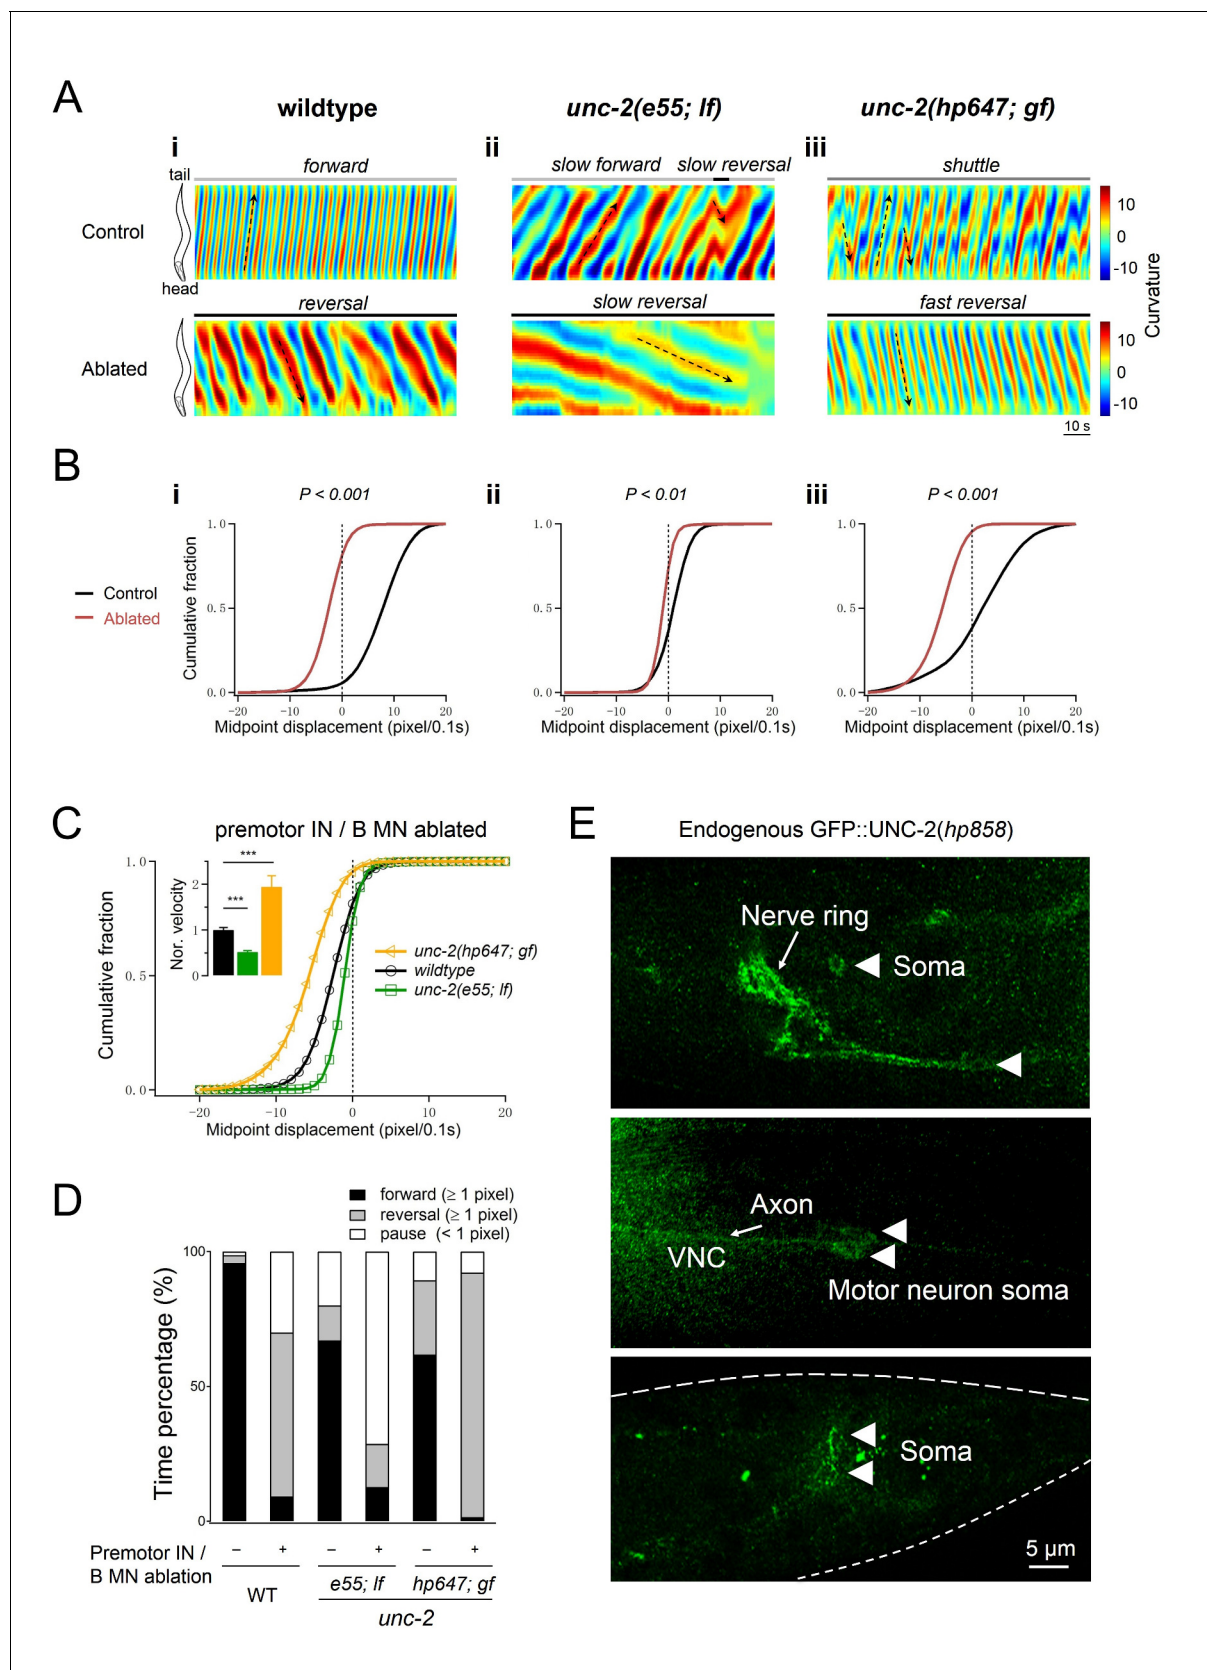

**Figure 8.** Increased UNC-2 activity leads to increased reversal velocity and duration. (A) Representative curvature kymographs of wildtype and *unc-2* mutant animals, without (Control) and with (Ablated) the co-ablation of premotor INs and B-MNs. Black arrows on kymographs denote directions of

Figure 8 continued on next page

## Figure 8 continued

bending propagation. (B) Distribution of instantaneous velocity exhibited by animals of respective genotypes, presented by the animal's mid-point displacement where the positive and negative values represent the forward and backward locomotion, respectively. While all animals exhibit backward locomotion upon the co-ablation of premotor INs and B-MNs, the speed of bending wave propagation, representing the reversal velocity, is significantly reduced and increased in *unc-2(lf)* and *unc-2(gf)* mutants, respectively.  $n = 10$  animals per group.  $**p < 0.01$ ,  $***p < 0.001$  against the non-ablated animals of the same genotype by the Kolmogorov-Smirnov test. (C) Distribution of the instantaneous velocity of wildtype, *unc-2(lf)*, and *unc-2(gf)* mutant animals, upon the removal of premotor INs and B-MNs. Decreased UNC-2 activity leads to drastic reduction of velocity, whilst increased UNC-2 activity leads to increased velocity.  $***p < 0.001$  against premotor IN and B-MN-ablated wildtype animals by the Kolmogorov-Smirnov test. Error bars, SEM. (D) Propensity of directional movements in animals of respective genotypes, quantified by the animal's mid-point displacement. Upon the removal of premotor INs and B-MNs, all animals shift to a bias for backward locomotion; Note that *unc-2(lf)* mutants also exhibit a significant increase of pauses, whereas *unc-2(gf)* mutants eliminate forward locomotion. (E) The expression pattern of endogenous UNC-2, determined by a GFP::UNC-2 (*hp858*) knock-in allele, stained with antibodies against GFP. Dense, punctate signals decorate the nerve processes of the central and peripheral nervous systems, as well as somata in central nervous system (top panel) and ventral cord motor neurons (middle panel), including the DA8 and DA9 soma (bottom panel). VNC, ventral nerve cord. Scale bar: 5  $\mu\text{m}$ .

DOI: <https://doi.org/10.7554/eLife.29915.019>

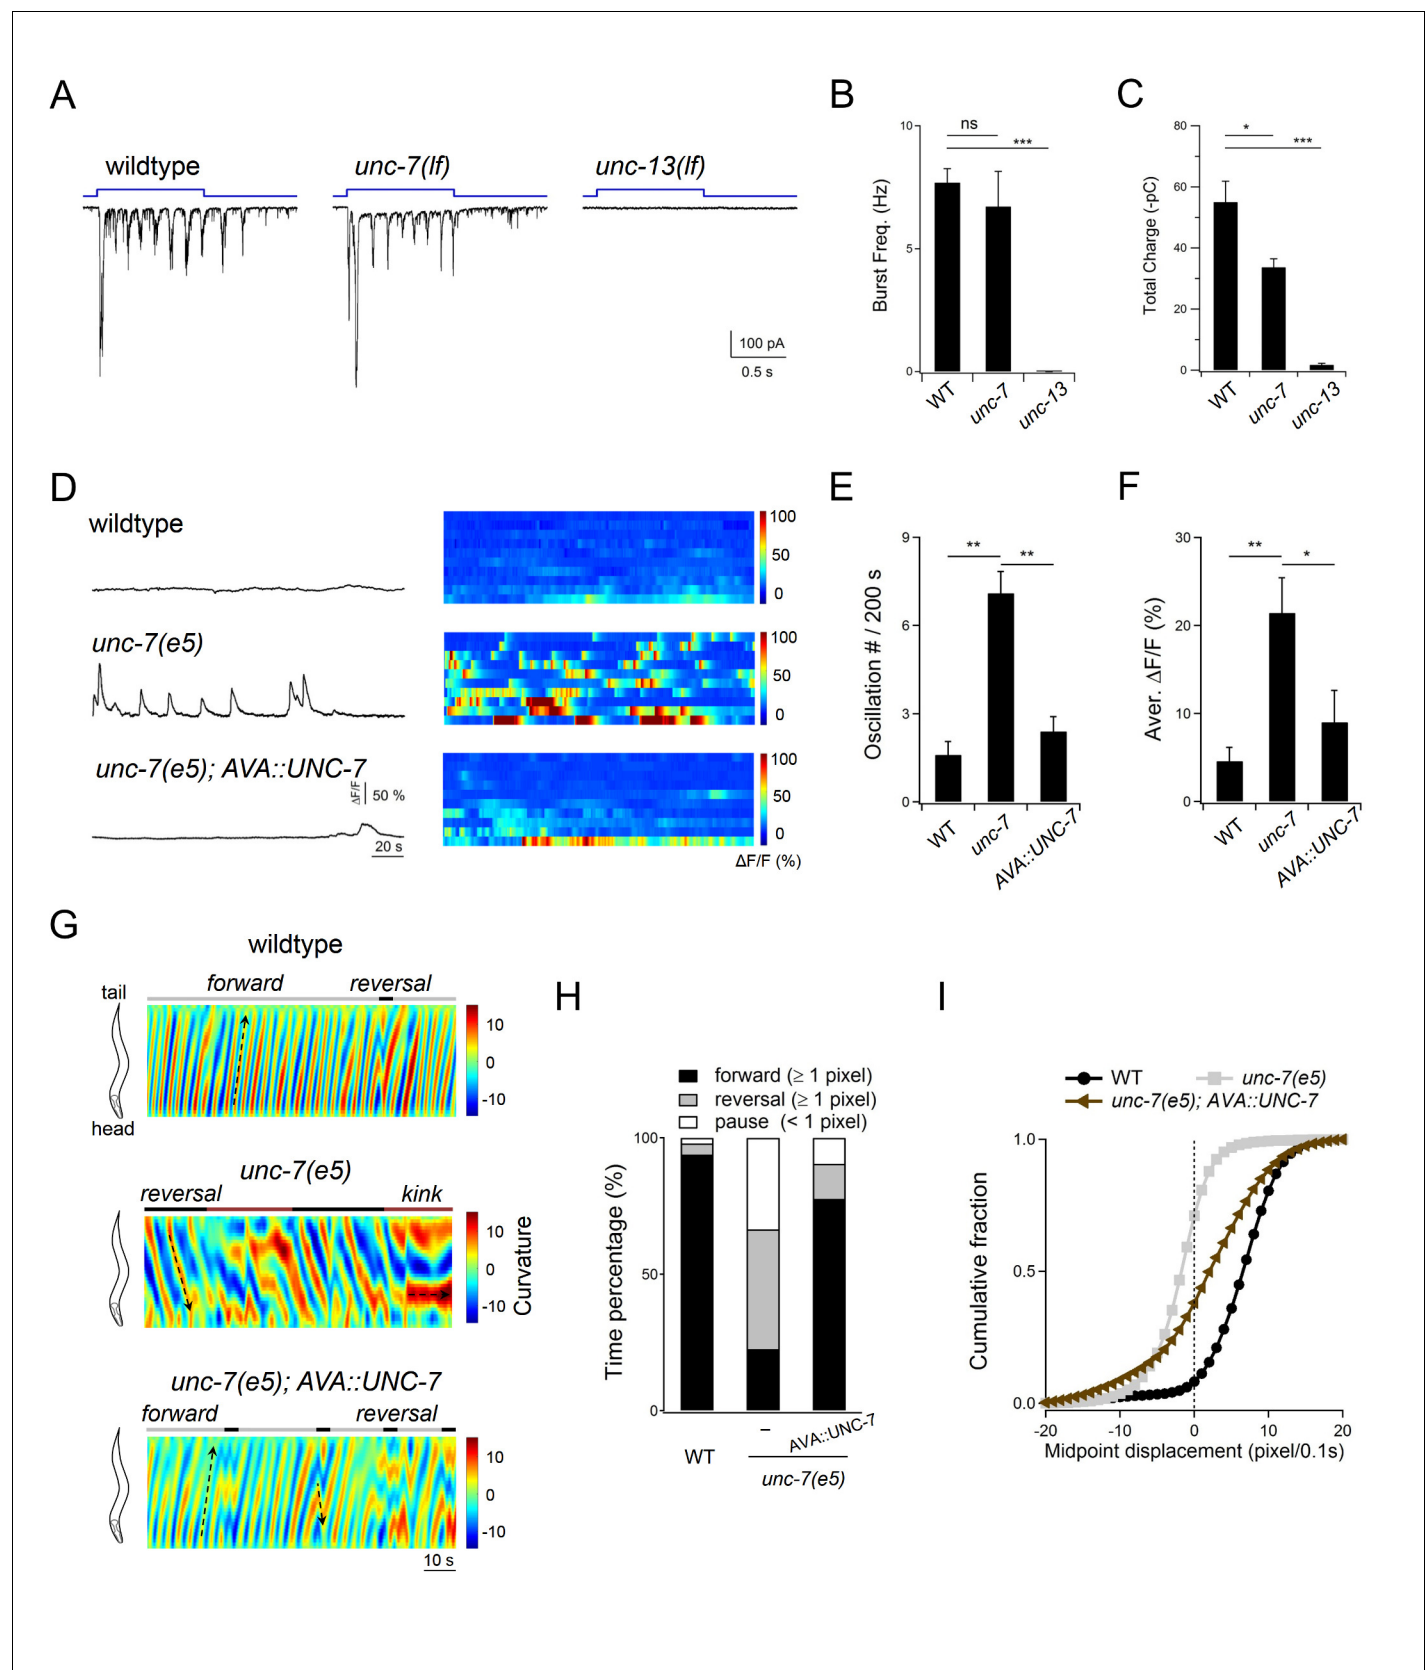

**Figure 9.** Descending premotor INs AVA exert dual modulation - inhibition and potentiation - of A-MN's oscillatory activity to control the reversal motor state. (A) Representative rPSC recordings in wildtype, *unc-7(lf)* and *unc-13(lf)* animals upon the optogenetic stimulation of premotor INs AVA. (B, Figure 9 continued on next page

## Figure 9 continued

(C) Quantification of the frequency (B) and total discharge (C) of rPSC bursts in respective genotypes.  $n = 16, 7$  and 3 animals for wildtype, *unc-7* and *unc-13*, respectively. (D) Representative DA9 soma  $\text{Ca}^{2+}$  traces and raster plots of all  $\text{Ca}^{2+}$  traces in wildtype, *unc-7(lf)* and AVA-specific UNC-7-rescued animals, all with the presence of premotor INs and B-MNs.  $n = 10$  animals each group. (E, F) Quantification of the  $\text{Ca}^{2+}$  oscillation frequency (E) and mean overall activities (F) in respective genotypes. DA9's activity exhibits significant increase in *unc-7(lf)* mutants in the presence of premotor INs and B-MNs. \* $P < 0.05$ , \*\* $p < 0.01$ , \*\*\* $p < 0.001$  against the respective wildtype Control group by the Mann-Whitney U test. Error bars, SEM. (G) Representative curvature kymograms of wildtype, *unc-7(lf)* and AVA-specific UNC-7-rescued animals in the presence of premotor INs and B-MNs. Upward and downward pointing black arrows on kymograms denote posterior- and anterior-propagating body bends; the horizontal black arrow denotes the absence of propagation. (H) Propensity of directional movements in animals of respective genotypes, quantified by the animal's mid-point displacement. A specific restoration of UNC-7 in AVA significantly rescued *unc-7* mutant animal's bias for backward movement and pause. (I) Distribution of instantaneous velocity of respective genotypes, presented by the animal's mid-point displacement. AVA-specific UNC-7 expression also partially rescued the mobility of *unc-7(lf)* mutant.  $n = 10$  animals per group.

DOI: <https://doi.org/10.7554/eLife.29915.020>

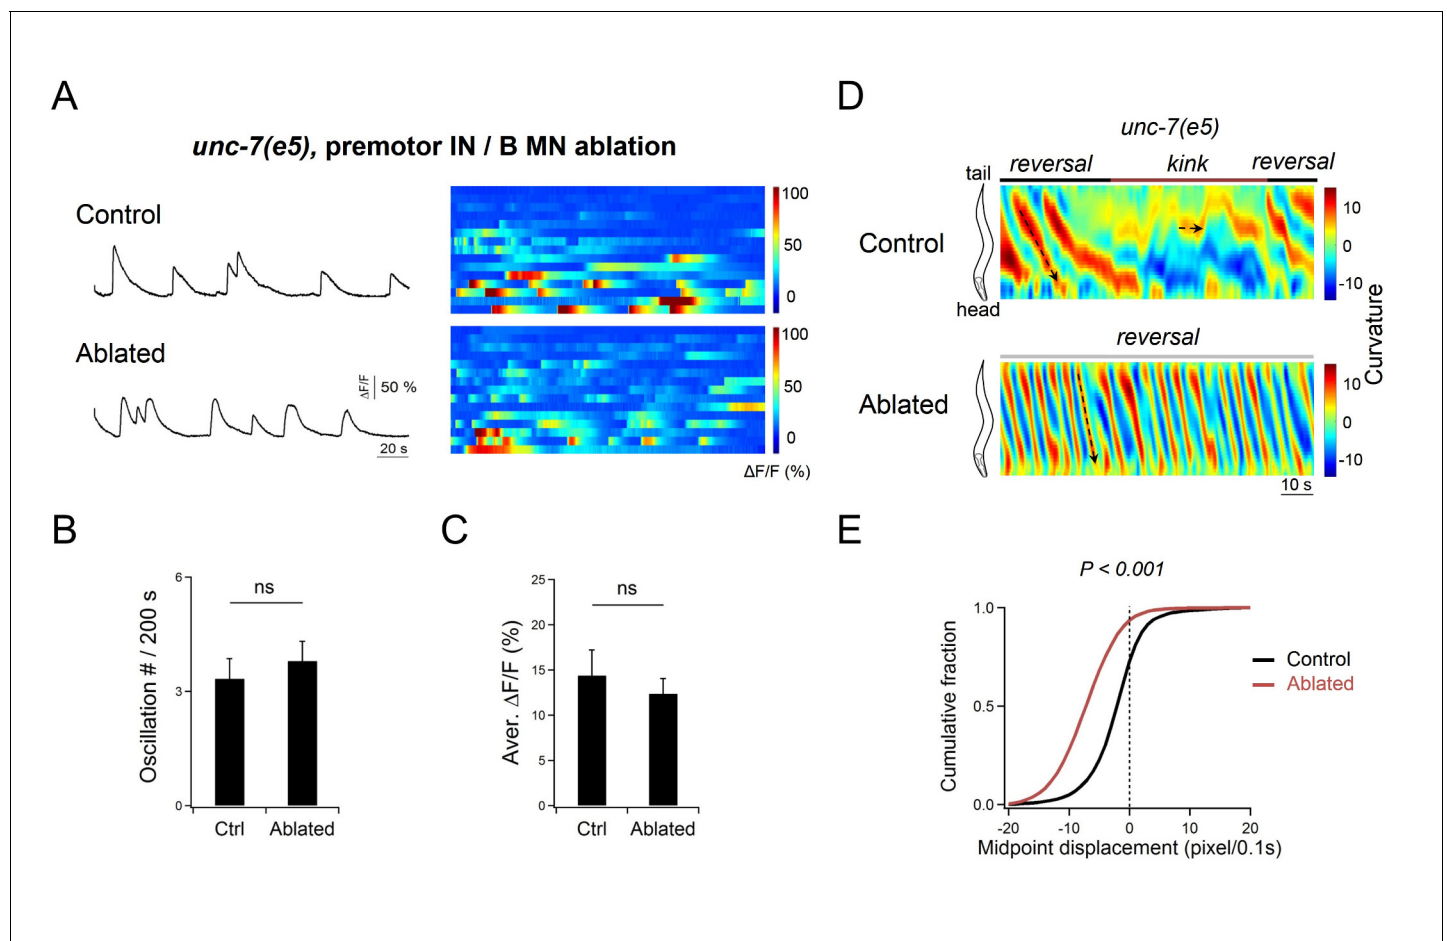

**Figure 9—figure supplement 1.** DA9 oscillation is not changed in *unc-7* mutant animals after the removal of premotor INs and B-MNs. (A) Representative DA9 soma  $\text{Ca}^{2+}$  traces and raster plots of all  $\text{Ca}^{2+}$  traces in *unc-7(e5; lf)* mutant animals before (Control) and after (Ablated) the ablation of premotor INs and B-MNs.  $n = 15$  animals for each group. (B, C) Quantification of the  $\text{Ca}^{2+}$  oscillation frequency (B) and overall activities (C) in respective genotypes. DA9's activity exhibits no significant difference after the co-ablation of premotor INs and B-MNs in *unc-7(e5; lf)* mutant animals. ns, not significant against Control animals by the Mann-Whitney U test. Error bars, SEM. (D) Representative curvature kymograms of wildtype and *unc-7* mutant animals, without (Control) and with (Ablated) the ablation of premotor INs and B-MNs. The black arrow denotes anteriorly propagating body bends. (E) Distribution of the instantaneous velocity of animals of respective genotypes, presented by the animal's mid-point displacement.  $n = 10$  animals per group. \*\*\* $p < 0.001$  against the respective, non-ablated Control group by the Kolmogorov-Smirnov test.

DOI: <https://doi.org/10.7554/eLife.29915.021>

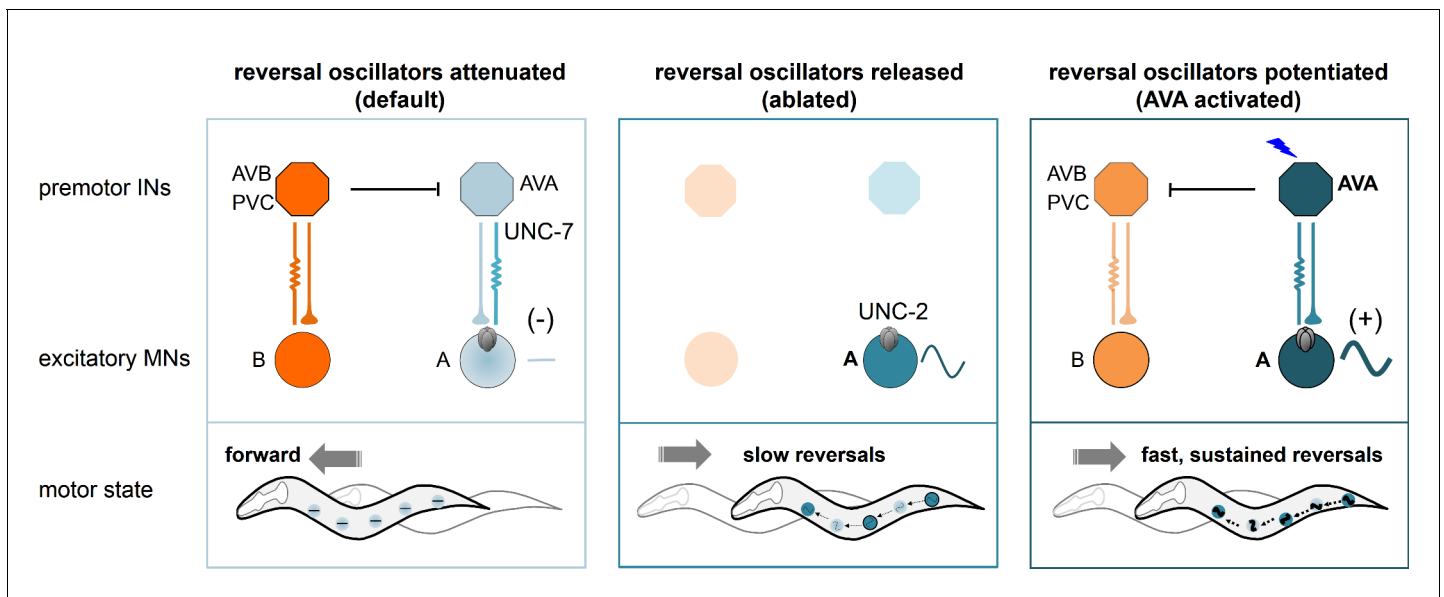

**Figure 10.** A model for a distributed reversal oscillator-driven motor circuit, dually regulated by the descending premotor INs to modulate the reversal motor state. Multiple A-MNs represent distributed and phase-coordinated intrinsic oscillators to drive backward locomotion. The descending premotor INs AVA exert state-dependent dual regulation - inhibition and activation - on A-MN's oscillatory activity to determine the initiation and substation of the reversal motor state through a mixed electrical and chemical synapse configuration. Left panel: at rest, A-MN intrinsic activity is inhibited by AVA through UNC-7 innexin-dependent coupling. Center panel: the ablation of premotor INs removes AVA-A coupling, releasing UNC-2 VGCC-dependent A-MN calcium oscillation, and permitting slow backward locomotion. Right panel: upon stimulation, AVA potentiate A-MN's oscillatory activity, primarily through chemical synapses, with a minor contribution from electrical synapses, permitting sustained reversals.

DOI: <https://doi.org/10.7554/eLife.29915.022>
